# Supplementary material for: Nutritional support in hospitalised patients with diabetes and risk for malnutrition: a secondary analysis of an investigator-initiated, Swiss, randomised controlled multicentre trial
Source: HighWire-hosted journal article supplement (doi:10.1136/bmjopen-2024-084754), 2024-08-01
Supplement: bmjopen-2024-084754supp001_data_supplement.pdf [file bmjopen-2024-084754supp001_data_supplement.pdf]

# Appendix:

## Nutritional support in hospitalized patients with diabetes and risk for malnutrition

### *A secondary analysis of an investigator initiated, Swiss, randomized controlled multi-center trial*

Bettina Keller<sup>1,2\*</sup>, Carla Wunderle<sup>1\*</sup>, Pascal Tribolet<sup>1,3,4</sup>, Zeno Stanga<sup>5</sup>, Nina Kaegi-Braun<sup>6</sup>, Beat Mueller<sup>1,2</sup>, and Philipp Schuetz<sup>1,2</sup>

1 Medical University Department, Division of General Internal and Emergency Medicine, Kantonsspital Aarau, Aarau, Switzerland

2 Medical Faculty of the University of Basel, Basel, Switzerland

3 Department of Health Professions, Bern University of Applied Sciences, Bern, Switzerland

4 Faculty of Life Sciences University of Vienna, Vienna, Austria

5 Division of Diabetes, Endocrinology, Nutritional Medicine and Metabolism, Bern University Hospital and University of Bern, Bern, Switzerland

6 Department of Bioscience and Nutrition, Karolinska Institutet, 17177 Stockholm, Sweden

20     **Supplemental Figure 1: Trial Flow Chart**

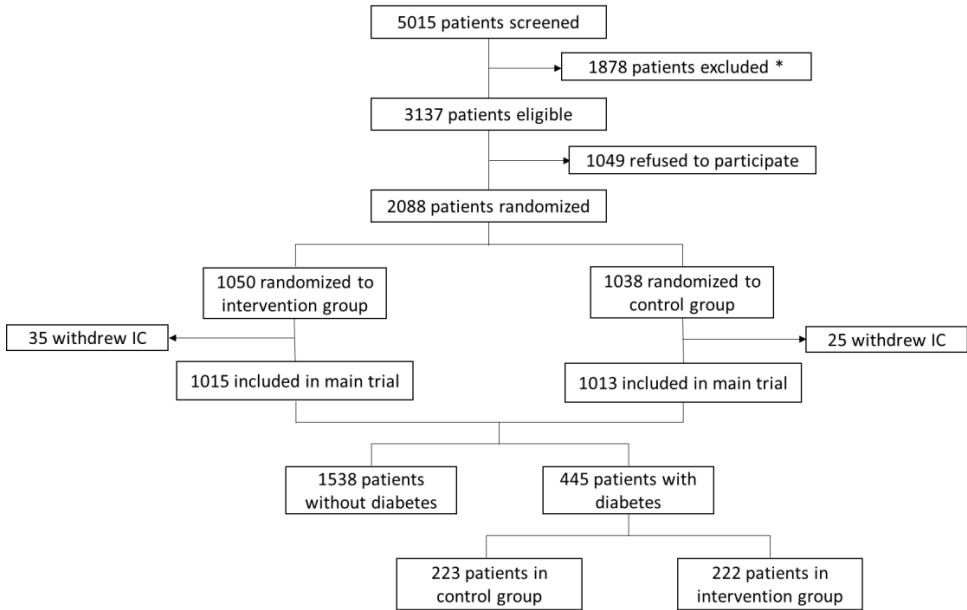

21

22     *Figure 1: Study flow chart. Abbreviations: IC; informed consent. \* Reasons for exclusion: 145 surgical*  
23     *patients, 268 unable to ingest oral nutrition, 158 with a terminal condition, 719 patients already*  
24     *receiving nutritional therapy upon admission, 31 hospitalized because of anorexia nervosa, 161 with*  
25     *acute pancreatitis, 81 with acute liver failure, 6 with cystic fibrosis, 11 with stem cell transplantation, 27*  
26     *with malnutrition after gastric bypass surgery, 43 with contradiction against nutritional therapy and 228*  
27     *previously included in the trial.*

28

29

30     **Supplemental Figure 2: 30-day Kaplan-Meier survival estimates**

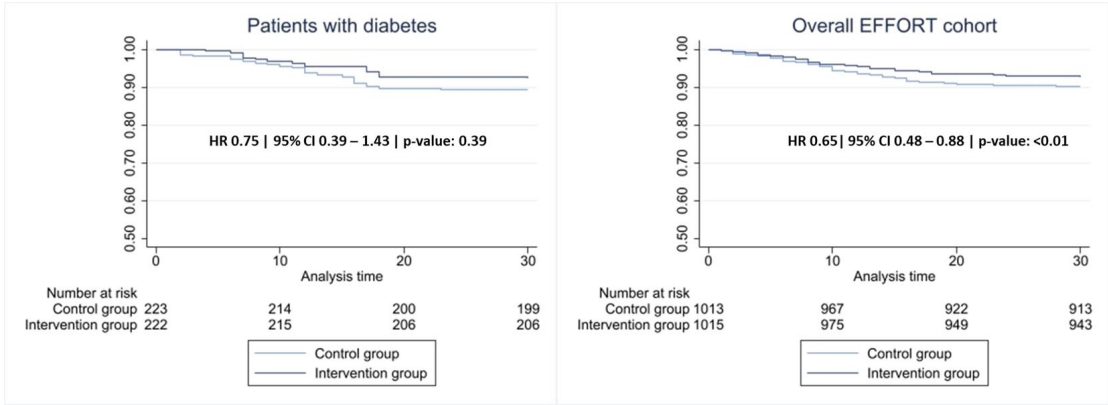

31  
32     *Figure 2: Survival analysis in patients with diabetes (left) and the total cohort (right): HR, Hazard ratio; CI,*  
33     *Confidence interval*

35     **Supplemental Figure 3: Mean blood glucose values**

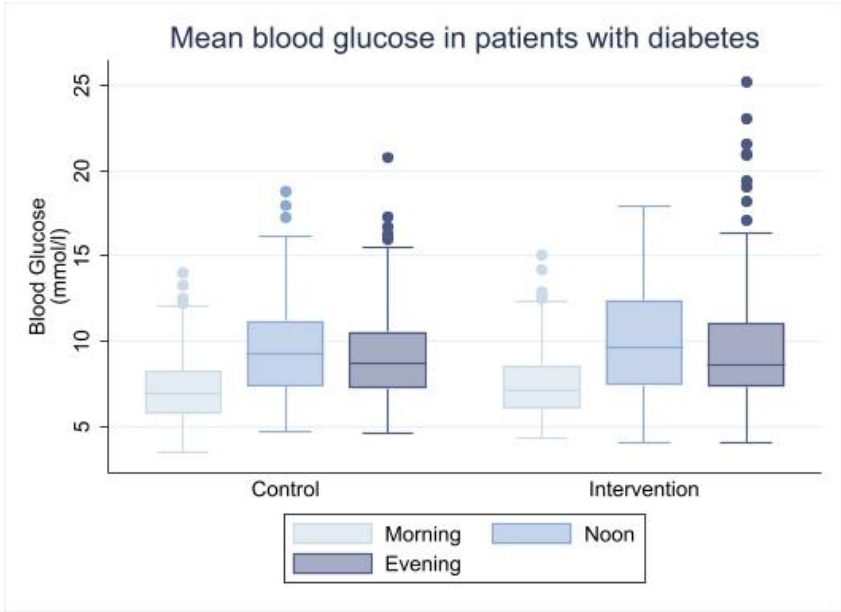

36

37     *Figure 4: Box plot illustrating mean glucose values of patients with diabetes according to*  
38     *randomization. (Whiskers indicating 25% and 75% of values, median indicated within the box)*

39

40

41     **Supplemental Figure 4: Mean rate of hyperglycemias in patients with diabetes**

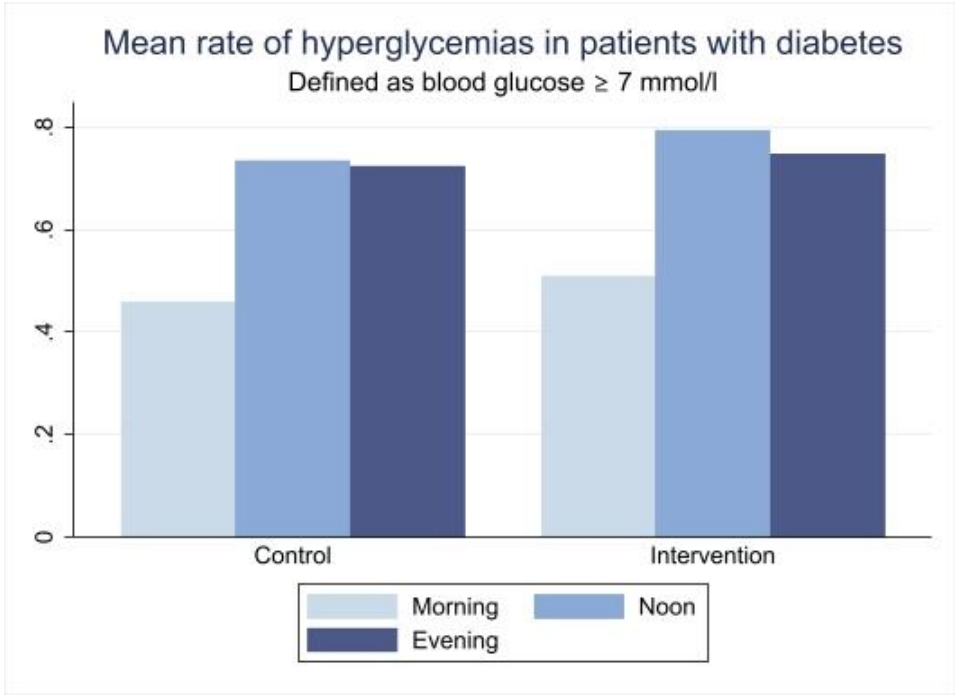

42  
43     *Figure 3: Bar graph illustrating the rates of hyperglycemia in patients with diabetes according to*  
44     *randomization.*

45

46 **Supplemental Figure 5: 180-day Kaplan-Meier survival estimates for patients**  
47 **with diabetes according to NRS total score**  
48 *NRS, Nutritional Risk Screening 2002*

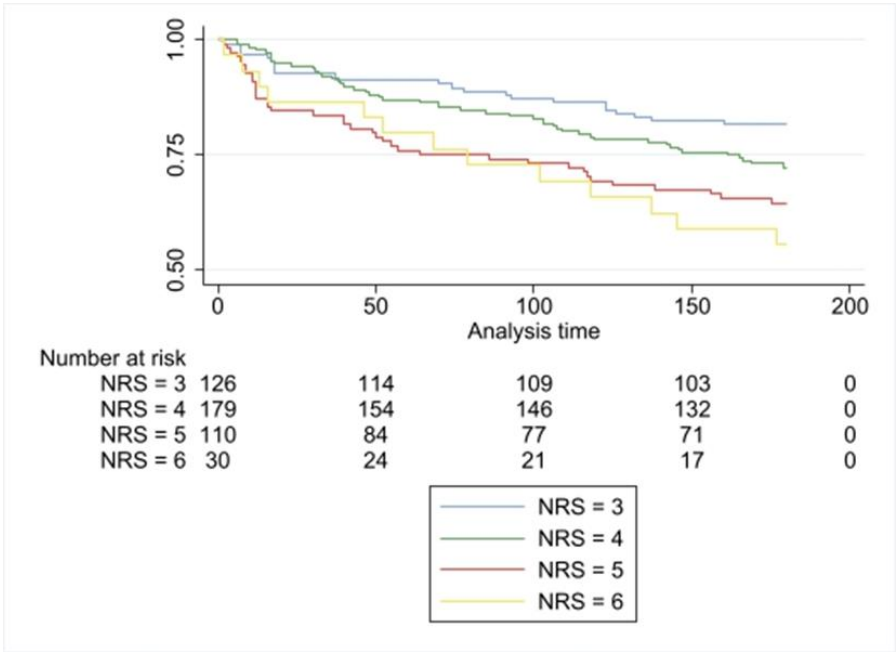

Supplemental Table 1: Baseline characteristics of the total EFFORT cohort compared to patients with diabetes stratified by randomization

| Factor                                  | Total cohort (n=2,028) | Patients with diabetes control group (n=223) | Patients with diabetes intervention group (n=222) | p-value |
|-----------------------------------------|------------------------|----------------------------------------------|---------------------------------------------------|---------|
| Sociodemographics                       |                        |                                              |                                                   |         |
| Number                                  | 2,028                  | 223                                          | 222                                               |         |
| Male                                    | 1064 (52%)             | 131 (59%)                                    | 139 (63%)                                         | 0.40    |
| Age, mean (SD)                          | 72. 6 (14.1)           | 75.3 (10.7)                                  | 75.5 (9.6)                                        | 0.80    |
| Nutritional assessment                  |                        |                                              |                                                   |         |
| Mean body-mass-index (kg/m²), mean (SD) | 24.8 (5.3)             | 26.9 (5.9)                                   | 27.0 (5.5)                                        | 0.80    |
| Weight (kg), mean (SD)                  | 70.9 (16.7)            | 76.8 (17.2)                                  | 77.0 (17.6)                                       | 0.90    |
| Height (cm), mean (SD)                  | 168 (9.3)              | 168 (9.1)                                    | 168 (9.8)                                         | 0.99    |
| NRS total score (%)                     |                        |                                              |                                                   |         |
| 3                                       | 624 (31%)              | 63 (28%)                                     | 63 (28%)                                          | 1.00    |
| 4                                       | 775 (38%)              | 88 (40%)                                     | 91 (41%)                                          |         |
| 5                                       | 524 (26%)              | 56 (25%)                                     | 54 (24%)                                          |         |
| >5                                      | 105 (5%)               | 16 (7%)                                      | 14 (6%)                                           |         |
| Admission diagnosis                     |                        |                                              |                                                   |         |
| Infection                               | 613 (30%)              | 71 (32%)                                     | 55 (25%)                                          | 0.10    |
| Cancer                                  | 374 (18%)              | 37 (17%)                                     | 35 (16%)                                          | 0.81    |
| Cardiovascular disease                  | 205 (10%)              | 30 (14%)                                     | 28 (13%)                                          | 0.79    |
| Frailty                                 | 194 (10%)              | 16 (7%)                                      | 17 (8%)                                           | 0.85    |
| Lung disease                            | 125 (6%)               | 13 (6%)                                      | 6 (3%)                                            | 0.10    |
| Gastrointestinal disease                | 164 (8%)               | 12 (5%)                                      | 29 (13%)                                          | 0.01    |
| Neurological disease                    | 95 (5%)                | 8 (4%)                                       | 7 (3%)                                            | 0.80    |
| Renal disease                           | 68 (3%)                | 11 (5%)                                      | 15 (7%)                                           | 0.41    |
| Metabolic disease                       | 62 (3%)                | 13 (6%)                                      | 11 (5%)                                           | 0.68    |
| Other                                   | 55 (3%)                | 6 (3%)                                       | 10 (5%)                                           | 0.30    |
| Comorbidity                             |                        |                                              |                                                   |         |
| Hypertension                            | 1109 (55%)             | 168 (75%)                                    | 161 (73%)                                         | 0.50    |
| Malignant disease                       | 667 (33%)              | 68 (31%)                                     | 64 (29%)                                          | 0.70    |
| Chronic kidney disease                  | 1347 (66%)             | 169 (76%)                                    | 172 (78%)                                         | 0.67    |
| Coronary artery disease                 | 566 (28%)              | 83 (37%)                                     | 77 (35%)                                          | 0.58    |
| Congestive heart failure                | 353 (17%)              | 52 (23%)                                     | 42 (19%)                                          | 0.3     |
| Chronic obstructive pulmonary disease   | 303 (15%)              | 32 (14%)                                     | 26 (12%)                                          | 0.41    |
| Peripheral artery disease               | 186 (9%)               | 41 (18%)                                     | 33 (15%)                                          | 0.32    |
| Stroke                                  | 162 (8%)               | 27 (12%)                                     | 19 (9%)                                           | 0.22    |
| Dementia                                | 75 (4%)                | 5 (2%)                                       | 11 (5%)                                           | 0.12    |

Table 1: Baseline characteristics of the entire study cohort compared to the subgroup of patients with diabetes shown according to randomization: NRS, Nutritional Risk Screening 2002.

57 **Supplemental Table 2: Multivariate analysis of clinical outcomes and randomization for**  
 58 **patients with diabetes (Extension)**

59

| Primary outcomes within 30 days                                     | Events intervention group | Events control group | Adjusted OR or coefficient (95% CI) | p-value | p for interaction |
|---------------------------------------------------------------------|---------------------------|----------------------|-------------------------------------|---------|-------------------|
| <b>Major complications</b>                                          |                           |                      |                                     |         |                   |
| <b>Any major complications</b>                                      |                           |                      |                                     |         |                   |
| <b>Patients with diabetes</b>                                       | 13/222 (6%)               | 17/223 (8%)          | 0.71 (0.33 - 1.52)                  | 0.37    | 0.46              |
| <b>Patients without diabetes</b>                                    | 61/793 (8%)               | 59/790 (7%)          | 1.03 (0.70 - 1.51)                  | 0.88    |                   |
| <b>Overall EFFORT cohort</b>                                        | 74/1015 (7%)              | 76/1013 (8%)         | 0.95 (0.68 - 1.34)                  | 0.79    |                   |
| <b>Respiratory failure</b>                                          |                           |                      |                                     |         |                   |
| <b>Patients with diabetes</b>                                       | 3/222 (1%)                | 3/223 (1%)           | 0.70 (0.11-4.27)                    | 0.70    | 0.93              |
| <b>Patients without diabetes</b>                                    | 11/793 (1%)               | 10/790 (1%)          | 1.24 (0.51 - 3.03)                  | 0.64    |                   |
| <b>Overall EFFORT cohort</b>                                        | 14/1015 (1%)              | 13/1013 (1%)         | 1.06 (0.49 - 2.28)                  | 0.89    |                   |
| <b>Nosocomial infection</b>                                         |                           |                      |                                     |         |                   |
| <b>Patients with diabetes</b>                                       | 9/222 (4%)                | 8/223 (4%)           | 1.03 (0.38 - 2.81)                  | 0.95    | 0.82              |
| <b>Patients without diabetes</b>                                    | 31/793 (4%)               | 31/790 (4%)          | 0.93 (0.55 - 1.58)                  | 0.80    |                   |
| <b>Overall EFFORT cohort</b>                                        | 40 /1015 (4%)             | 39/1013 (4%)         | 1.01 (0.63 - 1.59)                  | 0.98    |                   |
| <b>Major cardiovascular events</b>                                  |                           |                      |                                     |         |                   |
| <b>Patients with diabetes</b>                                       | 2/222 (1%)                | 2/223 (1%)           | 1.12 (0.15 - 8.49)                  | 0.91    | 0.88              |
| <b>Patients without diabetes</b>                                    | 6/793 (1%)                | 5/790 (1%)           | 1.53 (0.43 - 5.47)                  | 0.51    |                   |
| <b>Overall EFFORT cohort</b>                                        | 8 /1015 (1%)              | 7/1013 (1%)          | 1.11 (0.40 - 3.11)                  | 0.84    |                   |
| <b>Acute kidney injury</b>                                          |                           |                      |                                     |         |                   |
| <b>Patients with diabetes</b>                                       | 7/222 (3%)                | 12/223 (5%)          | 0.47 (0.17 - 1.29)                  | 0.14    | 0.15              |
| <b>Patients without diabetes</b>                                    | 25/793 (3%)               | 19/790 (2%)          | 1.30 (0.70 - 2.40)                  | 0.40    |                   |
| <b>Overall EFFORT cohort</b>                                        | 32/1015 (3%)              | 31/1013 (3%)         | 1.01 (0.61 - 1.69)                  | 0.96    |                   |
| <b>Gastrointestinal events</b>                                      |                           |                      |                                     |         |                   |
| <b>Patients with diabetes</b>                                       | 1/222 (<1%)               | 2/223 (1%)           | 0.46 (0.04 - 5.26)                  | 0.54    | 0.88              |
| <b>Patients without diabetes</b>                                    | 8/793 (1%)                | 13/790 (2%)          | 0.67 (0.27 - 1.65)                  | 0.38    |                   |
| <b>Overall EFFORT cohort</b>                                        | 9/1013 (1%)               | 15/1013 (1%)         | 0.57 (0.25 - 1.31)                  | 0.19    |                   |
| <b>Side effects from nutritional therapy</b>                        |                           |                      |                                     |         |                   |
| <b>Gastrointestinal side-effects</b>                                |                           |                      |                                     |         |                   |
| <b>Patients with diabetes</b>                                       | 8/222 (4%)                | 7/223(3%)            | 1.05 (0.35 - 3.19)                  | 0.93    | 0.88              |
| <b>Patients without diabetes</b>                                    | 35/793 (4%)               | 33/790 (4%)          | 1.15 (0.68 - 1.95)                  | 0.60    |                   |
| <b>Overall EFFORT cohort</b>                                        | 43/1015 (4%)              | 40/1013 (4%)         | 1.12 (0.68 - 1.83)                  | 0.66    |                   |
| <b>Complications due to enteral feeding or parenteral nutrition</b> |                           |                      |                                     |         |                   |
| <b>Patients with diabetes</b>                                       | 1/222 (<1%)               | 2/223 (1%)           | 0.48 (0.04 - 5.49)                  | 0.55    | 0.21              |
| <b>Patients without diabetes</b>                                    | -                         | -                    | -                                   | -       |                   |
| <b>Overall EFFORT cohort</b>                                        | 5/1015 (<1%)              | 3/1013 (<1%)         | 1.63 (0.38 - 6.95)                  | 0.51    |                   |
| <b>Liver or gallbladder dysfunction</b>                             |                           |                      |                                     |         |                   |
| <b>Patients with diabetes</b>                                       | 2/222                     | 4/223 (2%)           | 0.20 (0.02 - 1.97)                  | 0.17    | 0.82              |



|                           |              |             |                      |      |      |
|---------------------------|--------------|-------------|----------------------|------|------|
|                           | (1%)         |             |                      |      |      |
| Patients without diabetes | 2/793 (<1%)  | 3/790 (<1%) | 0.69 (0.11 – 4.17)   | 0.69 |      |
| Overall EFFORT cohort     | 4/1015 (<1%) | 7/1013 (1%) | 1.63 (0.38 - 6.95)   | 0.51 |      |
| Mean length of stay (d)   |              |             |                      |      |      |
| Patients with diabetes    | 10.4         | 9.8         | 0.49 (-0.67 - 1.66)  | 0.41 | 0.18 |
| Patients without diabetes | 9.2          | 9.6         | -0.53 (-1.17 – 0.12) | 0.11 |      |
| Overall EFFORT cohort     | 9.5          | 9.6         | -0.21 (-0.76 - 0.35) | 0.46 |      |

Table 4: Multivariate analysis, adjusted for NRS, Center of admission and Barthel index, examining the association between nutritional support and clinical outcomes: NRS, Nutritional Risk Screening 2002

64     **Supplemental Table 3: Mean blood glucose values in patients with diabetes**

|       | Control group |       |         | Intervention group |       |         |
|-------|---------------|-------|---------|--------------------|-------|---------|
|       | Morning       | Noon  | Evening | Morning            | Noon  | Evening |
| Day 1 | 7.34          | 10.01 | 9.37    | 7.95               | 10.21 | 10.01   |
| Day 2 | 7.36          | 9.57  | 9.42    | 7.61               | 10.22 | 10.38   |
| Day 3 | 7.41          | 9.86  | 9.18    | 7.42               | 10.47 | 10.13   |
| Day 4 | 7.41          | 10.08 | 9.11    | 7.71               | 9.80  | 9.67    |
| Day 5 | 7.40          | 9.65  | 10.07   | 7.69               | 11.43 | 10.38   |
| Day 6 | 7.45          | 9.71  | 9.45    | 7.58               | 10.24 | 10.66   |

65  
66

67 **Supplemental Table 4: Univariate analysis of the association of diabetes and outcomes**

| Outcomes                                     | Hazard ratio ,<br>coefficient or odds<br>ratio | 95% Confidence<br>Interval | p-value |
|----------------------------------------------|------------------------------------------------|----------------------------|---------|
| <b>Survival analysis</b>                     |                                                |                            |         |
| 30-day mortality                             | 1.10                                           | 0.78-1.56                  | 0.59    |
| 180-day mortality                            | 1.25                                           | 1.02-1.54                  | 0.03    |
| 3-year mortality                             | 1.14                                           | 0.98-1.33                  | 0.08    |
| <b>Readmission rates</b>                     |                                                |                            |         |
| 30-day non-elective readmission              | 0.69                                           | 0.46-1.04                  | 0.07    |
| 180-day non-elective readmission             | 0.92                                           | 0.73-1.17                  | 0.51    |
| 5-year non-elective readmission              | 0.90                                           | 0.64-1.27                  | 0.56    |
| <b>Major adverse outcomes within 30 days</b> |                                                |                            |         |
| Major complications                          | 0.88                                           | 0.58-1.33                  | 0.55    |
| Admission to intensive care unit             | 1.03                                           | 0.52-2.03                  | 0.93    |
| Nosocomial infection                         | 0.97                                           | 0.56-1.68                  | 0.93    |
| Respiratory failure                          | 1.02                                           | 0.41-2.53                  | 0.97    |
| Gastrointestinal events                      | 0.50                                           | 0.15-1.70                  | 0.27    |
| Acute kidney injury                          | 1.56                                           | 0.90-2.70                  | 0.11    |
| Major cardiovascular events                  | 1.30                                           | 0.41-4.09                  | 0.66    |
| Functional decline $\geq 10\%^*$             | 1.03                                           | 0.75-1.42                  | 0.87    |
| Any adverse outcome                          | 0.85                                           | 0.66-1.09                  | 0.19    |
| <b>Side effects of nutritional support</b>   |                                                |                            |         |
| Any side-effects                             | 2.15                                           | 1.65-2.80                  | <0.01   |
| Gastrointestinal side effects                | 0.78                                           | 0.44-1.37                  | 0.39    |
| Severe hyperglycemia                         | 6.76                                           | 4.39-10.42                 | <0.01   |
| Liver or gallbladder dysfunction             | 4.31                                           | 1.31-14.20                 | 0.02    |
| Refeeding Syndrom                            | 1.45                                           | 1.01-2.08                  | 0.04    |
| Feeding tube                                 | 1.42                                           | 0.28-7.37                  | 0.67    |
| Parenteral nutrition of feeding tube         | 2.14                                           | 0.51-9.00                  | 0.30    |
| Length of stay                               | 0.71                                           | 0.02-1.40                  | 0.04    |
| 180-day weight change                        | -0.94                                          | -1.71--0.17                | 0.02    |
| 30-day weight change                         | -0.08                                          | -0.75-0.58                 | 0.81    |

68 *Table 1: Univariate regression; association of diabetes with different outcomes. Hazard ratios were*  
69 *reported for survival analyses, odds ratios were reported for binary outcomes, coefficients were*  
70 *reported for continuous outcomes.*

71 *\*Defined as decline in Barthel index of  $\geq 10\%$*

72

73

74

75 **Supplemental Table 5: Multivariate analysis of the association of diabetes and outcomes**

| Outcomes                                     | Hazard ratio, coefficient or Odds ratio | 95% Confidence Interval | p-value |
|----------------------------------------------|-----------------------------------------|-------------------------|---------|
| <b>Mortality analysis</b>                    |                                         |                         |         |
| 30-day mortality                             | 1.05                                    | 0.73-1.53               | 0.76    |
| 180-day mortality                            | 1.21                                    | 0.98-1.49               | 0.07    |
| 3-year mortality                             | 1.10                                    | 0.94-1.28               | 0.22    |
| <b>Hospital readmissions</b>                 |                                         |                         |         |
| 30-day non-elective readmission              | 0.70                                    | 0.46-1.05               | 0.08    |
| 180-day non-elective readmission             | 0.95                                    | 0.75-1.21               | 0.69    |
| 5-year non-elective readmission              | 0.95                                    | 0.67-1.35               | 0.77    |
| <b>Major complications within 30 days</b>    |                                         |                         |         |
| Admission to intensive care unit             | 1.01                                    | 0.50-2.06               | 0.98    |
| Nosocomial Infection                         | 0.95                                    | 0.54-1.68               | 0.87    |
| Acute kidney injury                          | 1.44                                    | 0.81-2.54               | 0.21    |
| Respiratory failure                          | 0.85                                    | 0.31-2.29               | 0.74    |
| Gastrointestinal events                      | 0.52                                    | 0.15-1.75               | 0.29    |
| Adverse outcomes                             | 0.83                                    | 0.64-1.07               | 0.16    |
| Major complications                          | 0.84                                    | 0.55-1.29               | 0.43    |
| Major cardiovascular event                   | 1.27                                    | 0.39-4.09               | 0.69    |
| Functional decline $\geq 10\%^*$             | 0.99                                    | 0.72-1.37               | 0.97    |
| <b>Side effects from nutritional therapy</b> |                                         |                         |         |
| Any side effects                             | 2.24                                    | 1.70-2.95               | <0.01   |
| Gastrointestinal side effects                | 0.76                                    | 0.41-1.42               | 0.38    |
| Severe hyperglycemia                         | 6.82                                    | 4.39-10.59              | <0.01   |
| Liver or gallbladder dysfunction             | 3.49                                    | 0.97-12.58              | 0.06    |
| Refeeding syndrome                           | 1.43                                    | 0.98-2.07               | 0.06    |
| Feeding tube                                 | 1.72                                    | 0.31-9.51               | 0.53    |
| Parenteral feeding or feeding tube           | 2.66                                    | 0.59-12.01              | 0.20    |
| Length of stay                               | 0.46                                    | -0.22-1.14              | 0.18    |
| 180-day weight change                        | -0.94                                   | -1.71--0.16             | 0.02    |
| 30-day weight change                         | -0.09                                   | -0.76-0.58              | 0.80    |

76 Table 2: Multivariate regression adjusted for Nutritional Risk Screening 2002, Barthel Index and center  
77 of admission, association of diabetes with different outcomes. *Hazard ratios were reported for survival*  
78 *analyses, odds ratios were reported for binary outcomes, coefficients were reported for continuous*  
79 *outcomes.*

80 *\*Defined as decline in Barthel index of  $\geq 10\%$*

81

82 **Full list of investigators involved in the EFFORT trial:**

- 83 • Kantonsspital Aarau: Thomas Baumgartner; Valerie Bächli; Luca Bernasconi; Lisa Bonoure;  
84 Manuela Deiss; Andreas Eckart; Rebecca Fehr, Susan Felder; Natalie Friedli; Martina Geiser,  
85 Filomena Gomes, Lena Grädel; Andreas Huber; Daniel Koch; Alexander Kutz; Svenja  
86 Laukemann; Olivia Neeser; Manuela Nickler; Marc Meier; Marc Meili; Beat Mueller; Jonas  
87 Odermatt; Manuel Ottiger; Isabel Pulvermüller; Anna Christina Rast; Katharina Regez; Ramon  
88 Sager; Diana Sbiti; Ursula Schild; Philipp Schuetz; Deborah Steiner; Alaadin Vögeli; Yannick  
89 Wirz; Esther Wyrtsch; Giedre Zurauskaite; Seline Zurfluh;
- 90 • Inselspital Bern: Evelyne Abgottsporn; Drahomir Aujesky; Adrian Baumann; Kathrin Blaser;  
91 Jacques Donzé, Tanja Flückiger; Cindy Groen; Daniela Häfeli; Corinne Hänni; Katrin  
92 Lengacher; Melisa Merdanovic; Sarah Pfaffen; Nicolas Rodondi; Nathalie Schwab; Zeno  
93 Stanga; Monica von Brevern; Sophie von Lerber;
- 94 • Spital Lachen: Thomas Bregenzer; Bruno Schiesser; Pascal Tribolet; Anita Wild;
- 95 • Luzerner Kantonsspital: Daniela Buhl, Christoph Henzen; Silvia Mattmann; Melina Nigg; Sara  
96 Ramseier; Michael Trummler
- 97 • Kantonsspital Münsterlingen: Nina Braun; Claus Hoess, Cornelia Ebner; Dominique  
98 Mannhart; Vojtech Pavlicek, Sarah Schmid
- 99 • Bürgerspital Solothurn: Cornelia Albrecht; Claudia Brand; Katharina Ilic; Lisa Tanner; Robert,  
100 Thomann; Rahel von Felten;
- 101 • Kantonsspital St.Gallen: Carmen Benz; Michael Brändle, Stefan Bilz; Madlaina Höhener;  
102 Sarah Sigrist; Rahel Stadler; Alexandra Wick
- 103 • Kantonsspital Baselland, Bruderholz: Jonas Rutishauser; Marianne Waldmeier

104

105
